# Supplementary material for: Aminosteroid RM-581 Decreases Cell Proliferation of All Breast Cancer Molecular Subtypes, Alone and in Combination with Breast Cancer Treatments
Source: MDPI journal article supplement (doi:10.3390/jcm12134241), 2023-06-24
Supplement: s1 [file s1]

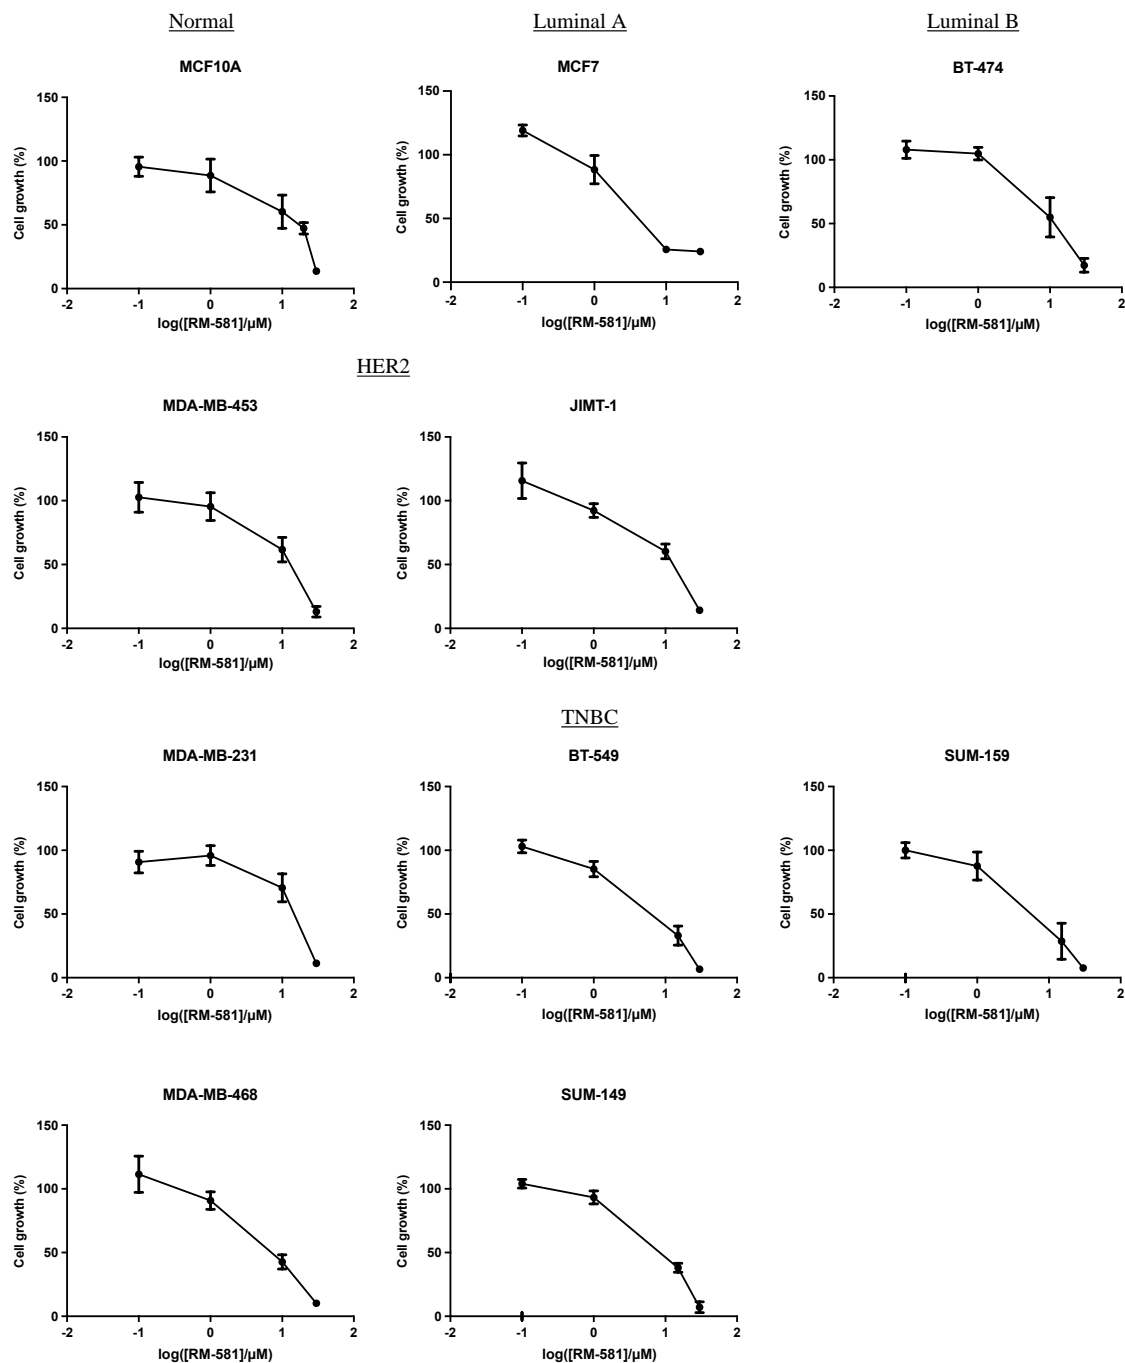

**Figure S1.** RM-581 has an antiproliferative effect on BC cell lines. Proliferation assays have been performed for each cell line, treated with increasing doses of RM-581 (0, 0.1, 1, 10, and 30μM). The cell growth was calculated as the percentage of treated cells compared to untreated cells. All experiments were done in triplicates and means  $\pm$  SD were calculated and plotted for each drug concentration.

**Table S1.** Breast cancer cell lines by molecular subtypes and culture media. ER – Estrogen receptor. PR – Progesterone receptor. HER2 – Human epidermal growth factor receptor 2. TNBC – Triple Negative Breast cancer.

| Cell lines    | ER<br>status | PR<br>status | HER2<br>status | Molecular<br>subtypes | Medium                                                                                                                                                                                | Provenance                                                                                     |
|---------------|--------------|--------------|----------------|-----------------------|---------------------------------------------------------------------------------------------------------------------------------------------------------------------------------------|------------------------------------------------------------------------------------------------|
| MCF7          | +            | +            | -              | Luminal A             | DMEM F12 (Wisent 319-080) with 5% FBS, 1% Penstrep, 13.4ml sodium bicarbonate 7.5% solution (Wisent 609-105), 7.5ml HEPES 1M (Wisent 330-050), and 10mM estradiol (E2) (Sigma E8875). | American Type Culture Collection (ATCC) - HTB-22                                               |
| BT-474        | +            | +            | +              | Luminal B             | RPMI-1640 (Wisent, 350-000-CL)                                                                                                                                                        | ATCC - HTB-20                                                                                  |
| BT-549        | -            | -            | -              | TNBC                  | with 10% fetal bovine serum (FBS) (Wisent, 080-150), 1% penicillin-streptomycin (Penstrep) (Wisent, 450-200-EL), and 10µg/ml insulin (Wisent 521-016).                                | ATCC - HTB-122                                                                                 |
| JIMT-1        | -            | -            | +              | HER2                  | DMEM (Wisent, 319-005-CL) with 10% FBS and 2mM L-glutamine.                                                                                                                           | Dr. Marcel B Bally, University of British Columbia, Vancouver, Canada                          |
| MDA-MB-453    | -            | -            | +              | HER2                  | RPMI-1640 with 10% FBS and 1% Penstrep.                                                                                                                                               | ATCC - HTB-131                                                                                 |
| MDA-MB-231    | -            | -            | -              | TNBC                  |                                                                                                                                                                                       | ATCC - HTB-26                                                                                  |
| MDA-MB-468    | -            | -            | -              | TNBC                  |                                                                                                                                                                                       | ATCC - HTB-132                                                                                 |
| SUM149PT      | -            | -            | -              | TNBC                  |                                                                                                                                                                                       | BIO IVT                                                                                        |
| SUM159PT      | -            | -            | -              | TNBC                  |                                                                                                                                                                                       | BIO IVT                                                                                        |
| MDA-BoM-1833  | -            | -            | -              | TNBC                  | DMEM (Wisent 319-005) with 10% FBS and 1% Penstrep.                                                                                                                                   | Dr. Joan Massague Howard Hughes Medical Institute, Memorial Sloan Kettering, New York, NY, USA |
| MDA-BoM-1834  | -            | -            | -              | TNBC                  |                                                                                                                                                                                       | Dr. Joan Massague Howard Hughes Medical Institute, Memorial Sloan Kettering, New York, NY, USA |
| MDA-MB-231-BR | -            | -            | -              | TNBC                  |                                                                                                                                                                                       | Dr. Patricia S. Steeg National Cancer Institute, Bethesda, MD, USA                             |

**Table S2.** qPCR primers details.

| <b>Genes</b>        | <b>Forward sequence 5'→3'</b> | <b>Reverse sequence 5'→3'</b> |
|---------------------|-------------------------------|-------------------------------|
| <b>BCL2</b>         | GGTGGGGTCATGTGTGTGGAGAG       | TGCAGGTGCCGGTTCAGGTACT        |
| <b>CYCS</b>         | AACAAAGGCATCATCTGGGGA         | AGGCAGTGGCCAATTATTACTCA       |
| <b>BIP</b>          | CTTGGTATTGAAACTGTGGGAGGTG     | TTCCAGTCAGATCAAATGTACCCAG     |
| <b>CHOP</b>         | GGAGGAGCCAGAACCAGCAGA         | TTCCGTTTCCTGGTTCTCCCTT        |
| <b>GAPDH</b>        | GGCTCTCCAGAACATCATCCCT        | ACGCCTGCTTCACCACCTTCTT        |
| <b>SCD</b>          | CCCACCTCTTCGGATATCGTC         | TTGTGGAAGCCCTCACCCAC          |
| <b>HPRT1</b>        | AGTTCTGTGGCCATCTGCTTAGTAG     | AAACAACAATCCGCCCAAAGG         |
| <b>3βHSD (gDNA)</b> | GAAGGGCAGAGGTGGAAGTAGAA       | AACAAAGACCAAAGACCAGTGAGA      |
